# Supplementary material
Source: publisher figshare collection journal article supplement (https://gsapubs.figshare.com/articles/dataset/_/23751177)
Supplement: Supplementary file 1 [file 1]

## Sheet: Unknowns
Table S3. Ar/Ar analytical data.
	Sample:	6PK (manuscript Sample F)			Identifier:	1601	x1 crystal
	Material:	Biotite			Location:	34.269822, -112.283151
																		Corrected1										Intercepts2										Blanks
	N	Tag	Power	Age	±1σ	K/Ca	±1σ	K/Cl	±1σ	Cum. %39Ar	%40Ar	40Ar*/39ArK	±1σ	39Ar/40Ar	±1σ	36Ar/40Ar	±1σ	40Ar	±1σ	39Ar	±1σ	38Ar	±1σ	37Ar	±1σ	36Ar	±1σ	40Ar	±1σ	39Ar	±1σ	38Ar	±1σ	37Ar	±1σ	36Ar	±1σ	40Ar	±1σ	39Ar	±1σ	38Ar	±1σ	37Ar	±1σ	36Ar	±1σ	Disc	±1σ
			%	(Ma)	(Ma)					(%)	(%)							(fA)		(fA)		(fA)		(fA)		(fA)		(fA)		(fA)		(fA)		(fA)		(fA)		(fA)		(fA)		(fA)		(fA)		(fA)
X	02A	omit	0.25	514.952	11.465	1.7333	4.77027	90.9645	59.0155	0.315673	22.4793	24.2315	0.618938	0.00927693	0.000204969	0.00259648	9.14802e-06	43.042	0.0204775	0.398811	0.00880578	0.0452569	0.0125332	0.00206042	0.00566427	0.11179	0.000383044	45.5327	0.0153275	0.409713	0.00655194	-0.00642438	0.00942455	0.0521574	0.00401281	0.123364	0.000361727	2.55855	0.0135792	0.0130312	0.00590519	-0.00241681	0.00834246	0.030543	0.00404948	0.00958736	0.000108645	1	0
X	02B	omit	0.5	1133.18	1.31746	5.95228	3.44895	884.394	341.472	4.74395	96.3138	63.9353	0.099701	0.0150644	2.32372e-05	0.000123432	7.00412e-07	398.385	0.0305692	5.99336	0.00923116	0.112088	0.0115389	0.00903266	0.00521739	0.0493003	0.000270537	400.877	0.0283776	6.01426	0.00664427	0.0536118	0.00933934	0.0577184	0.00406912	0.0597629	0.000256483	2.57383	0.0113662	0.0105196	0.00492939	-0.00452411	0.0068461	0.0277063	0.00331136	0.00953124	8.91034e-05	1	0
	02C	ok	0.75	1363.68	0.931723	-26.6644	31.054	-47371.1	425476	11.5859	99.6202	82.5243	0.079972	0.0120717	1.16752e-05	1.26924e-05	1.87813e-07	1214.23	0.0511114	14.6373	0.0141418	0.179629	0.0122332	-0.0048334	0.00570826	0.0153469	0.000215458	1216.8	0.049099	14.6639	0.008225	0.12981	0.00925683	0.0490096	0.00426073	0.0251825	0.000192654	2.64022	0.014201	0.00543664	0.00612422	-0.00675481	0.00807411	0.0212566	0.00385454	0.00946607	0.000104673	1	0
	02D	ok	1	1395.29	0.771253	24.3408	17.4705	8373.06	8967.25	15.695	99.8829	85.2614	0.0673518	0.011715	9.24194e-06	3.8935e-06	1.25906e-07	1694.93	0.0588983	19.8286	0.0156262	0.252947	0.0111697	0.00736131	0.00521747	0.00669766	0.000202163	1697.57	0.0577528	19.8915	0.00764894	0.200738	0.00891772	0.0534591	0.00416291	0.016547	0.00018706	2.69264	0.01156	0.00809505	0.00511321	-0.00058963	0.00682359	0.0228883	0.00321998	0.0096191	8.65885e-05	1	0
	02E	ok	1.25	1396.48	1.00602	9.7695	4.77957	2638.91	1512.57	10.2824	99.8781	85.365	0.0879103	0.0117002	1.20276e-05	4.05328e-06	1.87167e-07	1111.79	0.0478998	12.9904	0.0133401	0.180624	0.0124383	0.0119056	0.00579498	0.00466869	0.000193708	1114.5	0.0460323	13.0385	0.00763922	0.128153	0.00893299	0.0620276	0.00425931	0.0147828	0.000167699	2.79713	0.0132446	0.0131482	0.00634522	0.0133306	0.00875501	0.0270038	0.0040043	0.00995347	0.000104699	1	0
	02F	ok	1.5	1385.75	0.961652	-25.1654	29.2796	-6012.37	7654.87	10.0404	99.8574	84.4304	0.0835423	0.0118273	1.16816e-05	4.7463e-06	1.8296e-07	1074.01	0.0496885	12.6848	0.0125135	0.145985	0.011842	-0.00442937	0.00522186	0.00503564	0.000184155	1076.68	0.04846	12.7128	0.00797912	0.0983024	0.00951487	0.0509162	0.00409843	0.0150368	0.000166618	2.73917	0.0109807	0.00973249	0.00517012	0.00966426	0.00712255	0.0268667	0.0032842	0.00984093	8.70617e-05	1	0
	02G	ok	2	1373.93	0.866705	61.9555	145.154	13026.3	28424.8	13.0687	99.8283	83.4068	0.0748092	0.011969	1.07163e-05	5.72061e-06	1.65108e-07	1381.38	0.053811	16.5106	0.0147672	0.207966	0.0121886	0.00244506	0.00554974	0.00793521	0.000216084	1383.9	0.0521287	16.5332	0.00758027	0.157049	0.00910259	0.0565387	0.00402765	0.0177211	0.000193131	2.57899	0.01335	0.00276371	0.00593623	0.00154278	0.00815313	0.0267727	0.00385307	0.00954186	0.000106942	1	0
	02H	ok	2.5	1381.34	0.874578	16.3435	11.076	-13362.2	32748.4	11.3948	99.8463	84.0472	0.0757947	0.0118799	1.06925e-05	5.12029e-06	1.74323e-07	1213.46	0.0489233	14.3959	0.0129424	0.171576	0.0116379	0.00789165	0.00530305	0.00631435	0.000199696	1215.96	0.0476839	14.4378	0.00786271	0.127191	0.00946513	0.0542817	0.00434155	0.016041	0.000183747	2.55691	0.0109422	0.00624019	0.00485858	0.00403396	0.00686772	0.0272715	0.00311508	0.009522	8.89792e-05	1	0
	02I	ok	3	1394.98	0.902886	31.3822	38.4825	-7417.82	10073.7	12.2611	99.8926	85.2339	0.0788334	0.0117199	1.08233e-05	3.56984e-06	1.57169e-07	1323.55	0.0531538	15.4903	0.0142902	0.18015	0.0124998	0.00444912	0.00536814	0.00477929	0.000195616	1326	0.0515816	15.5639	0.00784468	0.127961	0.00908366	0.059717	0.00417323	0.0144609	0.000167367	2.5091	0.0128322	0.013935	0.0056822	0.00843187	0.00872367	0.0302471	0.00347634	0.00950533	0.000109362	1	0
	02J	ok	4	1387.95	1.6152	2.34596	0.564176	-3963.95	6922.35	4.65152	99.8479	84.6212	0.140487	0.0117995	1.95386e-05	5.06717e-06	3.59438e-07	498.671	0.0320017	5.87659	0.00972059	0.0654491	0.0114168	0.0222289	0.00533846	0.00281676	0.000164847	501.123	0.0301899	5.89985	0.00749886	0.00919256	0.00910286	0.0762531	0.00457316	0.0124786	0.000142258	2.52616	0.0106152	0.0115717	0.00481431	0.00458643	0.00701767	0.0335163	0.00285907	0.0095714	8.99986e-05	1	0
	02K	ok	6	1387.4	2.02217	5.15035	3.20873	1064.46	638.609	3.94236	99.8088	84.5738	0.175832	0.0118015	2.44721e-05	6.37406e-06	4.56139e-07	422.603	0.0313727	4.98066	0.0103192	0.0817517	0.0123798	0.00858012	0.00533091	0.00281336	0.000179443	425.101	0.0286328	4.99332	0.00725993	0.00991282	0.0097614	0.0715913	0.00414913	0.0125904	0.000148503	2.56595	0.0128223	0.00587255	0.00621424	-0.00502464	0.00769402	0.0400795	0.00339896	0.00970688	0.000106893	1	0
	02L	ok	8	1378.85	7.21517	1.54179	1.14857	291.847	184.871	0.904656	99.3937	83.8315	0.624448	0.0118565	8.80545e-05	2.02792e-05	1.72471e-06	96.5121	0.0222318	1.14291	0.00848063	0.0315506	0.010938	0.00656026	0.00488199	0.00204939	0.000153446	98.9891	0.0195215	1.14691	0.00674431	-0.0342738	0.00885009	0.0653416	0.00395608	0.0117348	0.000129211	2.55827	0.010638	0.00657184	0.00507127	-0.00453777	0.00648806	0.0365665	0.00290174	0.00964138	8.83182e-05	1	0
	02M	ok	10	1382.5	13.5283	1.75394	2.9408	576.498	1405.86	0.535793	97.9012	84.1479	1.17316	0.0116345	0.000161674	7.02711e-05	3.32549e-06	58.2522	0.0216949	0.676904	0.0093992	0.0141881	0.012627	0.00341013	0.0057113	0.00414015	0.000178353	60.7285	0.0173997	0.680436	0.00734039	-0.0457015	0.00959173	0.0554405	0.00427886	0.0137058	0.000147354	2.53967	0.0129584	0.00823059	0.0058581	-0.00405112	0.00827681	0.0266927	0.0038265	0.00948383	0.000106263	1	0
	02N	ok	15	1370.1	20.3525	0.240837	0.0852782	171.359	183.849	0.315412	85.0377	83.0764	1.75304	0.0102362	0.000214991	0.000501128	5.29931e-06	38.9345	0.0200752	0.398482	0.00835439	0.0187796	0.0109869	0.0145846	0.00514808	0.0197072	0.000194475	41.4087	0.016995	0.401487	0.00680485	-0.0414055	0.00868648	0.065042	0.00407415	0.0295536	0.000176432	2.54179	0.0106856	0.0079687	0.00486657	-0.00552303	0.00680812	0.0250352	0.00320436	0.00950416	8.80515e-05	1	0
	02O	ok	20	1260.51	58.3267	0.126669	0.0710083	26.9267	14.0491	0.12693	43.4079	73.9138	4.73194	0.00587279	0.000372763	0.0018955	1.13128e-05	27.2785	0.0219219	0.160359	0.0101511	0.037913	0.0135566	0.0111272	0.00618243	0.0518622	0.000294573	29.7496	0.0164564	0.163182	0.00762505	-0.0340881	0.0101219	0.0518804	0.00427927	0.0622031	0.000269387	2.54725	0.0144829	0.00729664	0.00674906	-0.00930028	0.00915337	0.0207816	0.00454858	0.00955635	0.000121166	1	0
	02P	ok	25	1147.21	47.0541	0.113656	0.0523347	30.1122	15.2262	0.135253	27.8412	65.0009	3.58829	0.00428321	0.000232261	0.00241689	8.97676e-06	39.8436	0.0228479	0.170874	0.00923834	0.0452048	0.0125379	0.0132035	0.00602109	0.0964807	0.000344211	42.318	0.0176712	0.178332	0.0063085	-0.0290299	0.00856818	0.0566506	0.00394511	0.107518	0.000318434	2.54725	0.0144829	0.00729664	0.00674906	-0.00930028	0.00915337	0.0207816	0.00454858	0.00955635	0.000121166	1	0
Integrated K/Ca ±2σ						10.2115	4.03285	SD		100										126.337
Weighted mean Age ±2σ				1384.9	8.75448	n=14/16	MSWD=*90.110
Total Integrated Age ±2σ				1371.06	0.711458
Isochron Age ±2σ				1385.44	4.3969		MSWD=*92.575
(40Ar/36Ar)trapped ±2σ				253.26	10.4424
	Sample:	6PK (manuscript Sample F)			Identifier:	1601	1 mg
	Material:	Biotite			Location:	34.269822, -112.283151
	02Q	ok	0.25	220.793	3.54477	6.93072	6.57346	445.394	108.992	0.171465	8.18313	9.56167	0.162955	0.00855832	1.64383e-05	0.00307532	3.36704e-06	637.235	0.0381773	5.44615	0.0104526	0.489611	0.0131897	0.00652371	0.00616494	1.9598	0.00214046	639.716	0.0350043	5.45368	0.00751085	0.427854	0.00921237	0.0616522	0.0045136	1.98865	0.0014174	2.60438	0.0152382	-0.0124492	0.0064156	0.00282252	0.00944761	0.0342558	0.00422097	0.00959913	0.000127865	1	0
X	02R	omit	0.5	733.529	0.496188	15.3392	3.9685	5631.72	2216.08	1.38527	80.474	36.7649	0.0301844	0.0218892	1.56837e-05	0.000653962	8.37395e-07	2012.94	0.064439	43.9994	0.0314923	0.817966	0.0134869	0.023905	0.00613556	1.31671	0.00168273	2015.45	0.0626114	44.039	0.0101835	0.745732	0.00958815	0.0787397	0.00447037	1.34073	0.00120597	2.60438	0.0152382	-0.0124492	0.0064156	0.00282252	0.00944761	0.0342558	0.00422097	0.00959913	0.000127865	1	0
X	02S	omit	0.75	1168.06	0.582527	26.379	3.03958	-23446.5	10678.4	5.16544	97.8497	66.5996	0.0449316	0.0146924	9.89486e-06	7.19884e-05	1.05568e-07	11182.6	0.212128	164.067	0.110447	2.11714	0.0130972	0.0520404	0.005915	0.805724	0.00117736	11185.2	0.211646	164.274	0.0162039	2.07476	0.00870567	0.081144	0.00411831	0.826832	0.000955949	2.66515	0.0142838	0.00147022	0.00681267	0.0156786	0.00940034	0.020012	0.00427388	0.00958161	0.000122008	1	0
	02T	ok	1	1326.99	0.66615	75.0505	9.61748	-29101.5	9073.25	11.6782	99.519	79.4068	0.0560427	0.0125329	8.84408e-06	1.60799e-05	3.26529e-08	29638.3	0.546259	370.927	0.261658	4.54679	0.0131607	0.0423627	0.00522352	0.477135	0.000964826	29642.2	0.546155	371.594	0.0230544	4.50388	0.0091817	0.0852526	0.00422352	0.495301	0.000898496	3.7037	0.0106849	0.0171874	0.00491729	0.0224249	0.00691318	0.0278203	0.00311816	0.00979504	9.29035e-05	1	0
	02U	ok	1.25	1361.21	0.782649	77.1883	7.60762	-17164	2901.86	17.5991	99.705	82.3122	0.0670859	0.0121131	9.87183e-06	9.85278e-06	2.32478e-08	46213	0.779796	558.988	0.455454	6.74353	0.0166869	0.0620342	0.00587553	0.456118	0.00107098	46218.4	0.779675	560.741	0.0285972	6.73179	0.00915273	0.101544	0.00458064	0.475559	0.00100911	5.20136	0.0137617	0.0412694	0.00574632	0.0308295	0.00853266	0.0394377	0.0037632	0.0102035	0.000124564	1	0
	02V	ok	1.5	1351.41	0.719954	104.552	14.9328	-15211.1	2360.76	14.2316	99.6564	81.4747	0.0613825	0.0122317	9.21443e-06	1.14789e-05	2.78315e-08	37008.2	0.695796	452.028	0.340414	5.44893	0.0145984	0.037521	0.00508089	0.425269	0.00102734	37013.1	0.695703	453.581	0.0265625	5.43506	0.00978881	0.10012	0.0040749	0.443638	0.000969312	4.70377	0.0113538	0.0364743	0.00476231	0.0250409	0.00709602	0.0363865	0.00312	0.0102956	0.000102828	1	0
	02W	ok	2	1348.69	0.766176	55.6883	4.22933	-18706.6	3565.07	16.3238	99.6287	81.2426	0.0652262	0.0122632	9.84481e-06	1.24081e-05	2.72864e-08	42339.6	0.745618	518.482	0.416126	6.2853	0.0166015	0.0787202	0.00580784	0.526395	0.0011522	42344.6	0.745494	520.271	0.0265575	6.25208	0.00990409	0.119879	0.004477	0.545939	0.00104446	4.76805	0.0135916	0.0394855	0.00578613	0.00947183	0.00869079	0.0288536	0.00378769	0.0105394	0.000123215	1	0
	02X	ok	2.5	1363.51	0.761831	26.5241	0.797211	-17449.5	2964.05	17.0693	99.7359	82.5095	0.0653836	0.0120879	9.57827e-06	8.81702e-06	2.52204e-08	44915.2	0.732204	542.163	0.429501	6.53431	0.0158271	0.170185	0.00504097	0.398352	0.00113038	44922.8	0.732115	543.837	0.0289416	6.5199	0.009555	0.215592	0.00398713	0.416572	0.00108865	7.31515	0.0113888	0.0685735	0.00488906	0.00811291	0.00714633	0.029417	0.00313037	0.0105534	0.00010229	1	0
	02Y	ok	3	1364.02	0.824203	7.73007	0.15058	-38104.2	19820.2	8.45844	99.7569	82.5537	0.0707566	0.012084	1.03563e-05	8.11332e-06	3.02234e-08	22263.6	0.387539	268.66	0.230191	3.27197	0.0137426	0.286089	0.00554443	0.184673	0.000668136	22276.1	0.387278	269.428	0.0198217	3.20056	0.0093331	0.339321	0.00405839	0.198857	0.000646154	12.4377	0.0142406	0.126973	0.0062455	0.00600439	0.00843455	0.0323657	0.00376016	0.0105404	0.000124485	1	0
	02Z	ok	4	1359.87	0.727869	4.38867	0.0890974	-16488.5	5525.6	4.35824	99.7313	82.1974	0.0623447	0.0121333	9.20094e-06	8.96954e-06	4.69562e-08	11424.5	0.224113	138.428	0.10493	1.66672	0.0116253	0.259043	0.00524283	0.106137	0.000531147	11434.2	0.223806	138.879	0.0146743	1.60841	0.00908562	0.312582	0.00421917	0.118636	0.000521149	9.71238	0.0117176	0.0956588	0.00505724	0.00866195	0.00688852	0.0352626	0.00312077	0.0104459	0.000102409	1	0
	02AA	ok	6	1353.79	0.771721	3.53535	0.113003	-10227.8	3921.61	2.41925	99.6965	81.6778	0.0658818	0.0122062	9.84225e-06	1.01343e-05	6.54907e-08	6303.72	0.141258	76.841	0.0619292	0.91395	0.0124734	0.178118	0.00568051	0.0664067	0.00040474	6306.37	0.140571	77.0953	0.0120433	0.853743	0.00957247	0.224765	0.00426755	0.0777756	0.000387157	2.70962	0.0139099	0.0129004	0.0056899	0.0133495	0.00797815	0.0409936	0.00380159	0.0101569	0.000121323	1	0
	02AB	ok	8	1328.93	1.39586	3.49203	1.10886	-14593	77223	0.224648	99.5382	79.5698	0.117557	0.0125097	1.84128e-05	1.54375e-05	3.93937e-07	571.154	0.0338771	7.13536	0.0104911	0.0863327	0.0114102	0.0167354	0.00530403	0.00905467	0.000211842	573.732	0.0318658	7.18464	0.00719397	0.0146678	0.00937378	0.0644179	0.00436795	0.0192642	0.000190142	2.69281	0.0114991	0.00828299	0.00483145	0.00923671	0.00663039	0.0377083	0.00309805	0.0100674	9.86805e-05	1	0
	02AC	ok	10	1350.59	1.85372	1.47822	0.253816	4258.42	8577.45	0.180554	99.64	81.4048	0.157975	0.0122402	2.36833e-05	1.2028e-05	4.54498e-07	469.1	0.0340098	5.73484	0.0110842	0.0767994	0.0119613	0.0316842	0.00543467	0.00609672	0.0001985	471.635	0.031056	5.76771	0.00746458	0.00532712	0.00886362	0.0764606	0.0041702	0.0160291	0.000165714	2.63513	0.0138634	-0.0026609	0.00627392	-0.00176484	0.00813636	0.0303415	0.0035602	0.0098413	0.000112693	1	0
	02AD	ok	15	1340.15	1.92667	2.9111	1.14191	1012.26	533.076	0.153571	99.5995	80.5179	0.163259	0.01237	2.50006e-05	1.3383e-05	4.8942e-07	394.849	0.0314067	4.87779	0.00984761	0.0816094	0.0111909	0.0136884	0.00536069	0.00548688	0.000177343	397.326	0.0292117	4.90948	0.00755265	-0.00593757	0.00889421	0.0601363	0.00452526	0.0154195	0.000152428	2.6071	0.011535	-0.000917157	0.00514303	-0.00262745	0.00688374	0.0323908	0.00295003	0.00984817	9.4023e-05	1	0
	02AE	ok	20	1362.52	0.915255	6.322	1.73349	-2690.97	1380.54	0.491574	99.4808	82.425	0.0785088	0.0120694	1.14667e-05	1.73621e-05	2.12309e-07	1295.44	0.0496068	15.6136	0.0148196	0.168631	0.013121	0.0201787	0.00551457	0.0227707	0.000263391	1297.87	0.0473812	15.6555	0.0081108	0.114417	0.00942521	0.0733718	0.00410672	0.0329058	0.000236461	2.53569	0.0146923	0.00327278	0.00625128	-0.00489988	0.00918016	0.0367167	0.00371662	0.00982025	0.000120672	1	0
	02AF	ok	25	1465.42	3.53852	13.9258	47.7377	8582.07	53158.1	0.089648	99.3082	91.5046	0.321081	0.0108529	3.79652e-05	2.31442e-05	8.19599e-07	262.736	0.0308586	2.84744	0.00995263	0.0372565	0.00906417	0.00167634	0.00570507	0.00610513	0.000199177	265.142	0.0263462	2.87132	0.0070271	-0.0445858	0.00908665	0.0501758	0.00404067	0.0160562	0.000151986	2.53515	0.0160665	0.00355896	0.00683452	-0.00484174	0	0.0376514	0.00405806	0.0098658	0.000132022	1	0
										100										3176.24
Integrated K/Ca ±2σ						20.4216	0.706519	SD
Weighted mean Age ±2σ				1347.42	44.4039	n=14/16	MSWD=*8083.694
Total Integrated Age ±2σ				1335.73	0.544546
Isochron Age ±2σ				1355.56	4.31255		MSWD=*301.798
(40Ar/36Ar)trapped ±2σ				97.4016	0.876177
	Sample:	SB-02 (manuscript Sample E)			Identifier:	1602	x1 crystal
	Material:	Biotite			Location:	34.07206111, -112.3677778
	01A	ok	0.5	35.8582	0.340704	40.7111	51.5025	5346.33	3860.56	7.7826	16.5282	1.47546	0.0141568	0.11203	9.42283e-05	0.00279577	4.41672e-06	185.237	0.0262638	20.7216	0.0171756	0.366832	0.0123269	0.00455526	0.00564331	0.517903	0.000811225	187.86	0.0224299	20.7498	0.00839371	0.304146	0.00933129	0.0711823	0.00425705	0.535579	0.000677419	2.69088	0.0136633	0.00423641	0.00628003	-0.00429562	0.00808808	0.0423581	0.00373792	0.00981967	0.000108199	1	0
	01B	ok	0.75	30.4711	0.117511	46.6366	27.4123	30435.5	50807.1	17.7887	37.512	1.25195	0.00486839	0.299694	0.00020568	0.00209271	4.27536e-06	158.294	0.0246515	47.3634	0.0316238	0.645568	0.0113632	0.00911148	0.00522881	0.33131	0.00067093	160.915	0.0219656	47.4377	0.00979786	0.585308	0.00908109	0.0705515	0.00424255	0.346212	0.000620144	2.69318	0.0111898	0.00384146	0.00507774	-0.00461611	0.00684739	0.041232	0.00310371	0.00990528	9.05752e-05	1	0
	01C	ok	1	32.7958	0.116895	41.9848	21.4135	-129251	956697	20.3435	39.9012	1.34832	0.00484903	0.295996	0.000264518	0.00201267	4.14729e-06	183.288	0.0256332	54.1656	0.0477757	0.726712	0.0135728	0.0115277	0.00575386	0.368968	0.000754213	185.92	0.0211096	54.2933	0.0104536	0.672905	0.00938227	0.0717608	0.00398013	0.384438	0.000647255	2.69825	0.0145412	0.00288782	0.00630156	-0.00504177	0.00982046	0.0383281	0.00421531	0.010119	0.000125983	1	0
	01D	ok	1.25	31.3612	0.133012	27.1619	13.6372	5762.64	2860.98	13.5923	38.3783	1.28884	0.00551328	0.297839	0.000269595	0.00206369	4.90617e-06	121.704	0.0246015	36.1902	0.031908	0.515369	0.0137037	0.0118091	0.00584641	0.251269	0.000589575	124.319	0.0202118	36.2701	0.00952897	0.451941	0.00996063	0.0710411	0.00426089	0.264958	0.000527114	2.69665	0.0140255	0.00300577	0.00608009	-0.00427521	0.00946732	0.0383082	0.00406495	0.010107	0.000121471	1	0
	01E	ok	1.5	32.8902	0.220875	8.3158	3.80603	-8099.66	14901.4	4.48443	38.5124	1.35224	0.00916281	0.284864	0.000387072	0.0020592	8.19735e-06	41.9809	0.0223062	11.94	0.0149236	0.155071	0.0119562	0.0124209	0.00566019	0.0865946	0.000332203	44.5019	0.0177489	11.9716	0.00802369	0.0967776	0.00927733	0.058246	0.00433501	0.0971708	0.000310247	2.6556	0.0135109	0.00518947	0.00642445	0.0135777	0.00755189	0.03532	0.00365009	0.00978876	0.000103404	1	0
	01F	ok	1.75	43.0526	0.394105	2.70599	0.897406	-693.846	258.032	1.81356	45.2589	1.77499	0.0164402	0.255029	0.000576535	0.00183322	1.32492e-05	18.962	0.019476	4.82871	0.00971872	0.0346135	0.0114141	0.0153824	0.00509355	0.0349528	0.000238818	21.4923	0.0159549	4.85379	0.00736636	-0.0037289	0.0095476	0.0563561	0.0041261	0.0450872	0.000222817	2.6566	0.0111694	0.00348433	0.00527284	0.00956014	0.00629009	0.0305543	0.00300869	0.00977808	8.78739e-05	1	0
	01G	ok	2	39.4605	0.321811	2.72828	0.629308	1106.6	478.708	2.7022	43.6152	1.62529	0.0133981	0.268406	0.000443498	0.00188827	1.14823e-05	26.8455	0.0209201	7.19477	0.0104762	0.125784	0.0124022	0.0226946	0.00522666	0.0509988	0.000297251	29.36	0.0160076	7.21383	0.00702774	0.0621775	0.00970457	0.0641203	0.00382005	0.0613904	0.000274286	2.66536	0.0134688	-0.00232987	0.00620218	0.000373973	0.00777022	0.0203737	0.00359586	0.00978647	0.00011441	1	0
	01H	ok	2.5	38.6598	0.197157	5.79522	1.46428	-7639.21	10093.6	5.54434	43.8173	1.59196	0.00820472	0.275295	0.000262102	0.0018815	7.11754e-06	53.7061	0.0197201	14.7621	0.012957	0.190143	0.0112524	0.0219459	0.00552808	0.101322	0.000372842	56.2351	0.0162524	14.7868	0.00743359	0.127604	0.00917514	0.0599613	0.00466521	0.112365	0.000354617	2.67729	0.0111687	-0.00511006	0.00504966	0.00255292	0.00654517	0.0243434	0.00299408	0.00985572	9.38924e-05	1	0
	01I	ok	3	41.7778	0.225335	39.1613	86.0087	-40643.9	407253	4.35417	47.0294	1.72183	0.00939335	0.27319	0.000332898	0.00177389	8.07439e-06	42.5042	0.0220013	11.5932	0.0127812	0.154008	0.0126016	0.00259033	0.00557554	0.0754169	0.000332305	45.1896	0.0173016	11.6101	0.00800598	0.0939876	0.00948116	0.0497711	0.00419554	0.0866771	0.000309839	2.80547	0.0135908	-0.0108794	0.00579067	0.00932382	0.00833354	0.0343876	0.00369576	0.0104058	0.00011078	1	0
	01J	ok	4	41.4218	0.228424	5.84661	2.06408	-8147.01	17891	3.69758	48.7006	1.70699	0.00952028	0.28536	0.000379555	0.00171789	8.53768e-06	34.5542	0.0200332	9.84502	0.0117776	0.125649	0.0117008	0.0144754	0.00509461	0.0595425	0.000284565	37.4301	0.0166355	9.86643	0.00843277	0.0772497	0.00951326	0.0543978	0.00406761	0.0713517	0.00026826	2.9942	0.011162	-0.00823946	0.00481323	0.0116056	0.00686615	0.0341126	0.00310321	0.011126	9.32602e-05	1	0
	01K	ok	6	49.2783	0.307317	5.41981	2.76485	-1553.59	971.741	2.66752	52.1021	2.03514	0.0128634	0.25606	0.000442988	0.00160397	1.03126e-05	27.78	0.020921	7.10244	0.0110558	0.0746533	0.0126106	0.0112438	0.00571946	0.0446959	0.000273513	31.0218	0.0162343	7.1246	0.00746605	0.023979	0.00964561	0.0527853	0.00421258	0.0578363	0.000247447	3.37619	0.013196	0.000318483	0.0059059	0.0135439	0.00819448	0.0331641	0.00391576	0.0126303	0.000118444	1	0
	01L	ok	8	42.3916	0.229122	36.0335	73.4344	3305.29	2527.97	4.22785	46.3711	1.74742	0.00955441	0.26542	0.000351897	0.00179595	7.94165e-06	42.4791	0.0201313	11.2569	0.0139314	0.166367	0.0114834	0.00272159	0.00544445	0.0763172	0.000326972	45.5291	0.0168284	11.2971	0.00869743	0.10695	0.00930018	0.0530481	0.00442249	0.0891307	0.000310066	3.17861	0.0110488	0.00376863	0.00491746	0.00597535	0.00678861	0.0326944	0.00321795	0.011966	9.65973e-05	1	0
	01M	ok	10	37.9908	0.160986	13.8303	6.05425	-8093.42	9154.15	7.83661	43.7412	1.56413	0.006697	0.279709	0.000318873	0.00188404	5.67656e-06	74.7153	0.0221663	20.8654	0.0229549	0.269035	0.0128443	0.0129725	0.0056381	0.14091	0.000414824	77.2494	0.0173274	20.9245	0.00830816	0.19721	0.0098858	0.055988	0.00418301	0.152685	0.000383388	2.66963	0.0138241	0.0132789	0.00605788	-0.0117329	0.00823177	0.0313169	0.00381113	0.0101956	0.000111347	1	0
	01N	ok	12	47.5616	0.385352	10.9314	15.1566	3200.03	5197.23	1.93819	50.623	1.96332	0.0161147	0.257893	0.000556275	0.00165352	1.30878e-05	20.0418	0.0200635	5.16055	0.0098545	0.0761507	0.0115514	0.00405096	0.00558486	0.0331906	0.000248645	22.5607	0.0165885	5.19745	0.00734707	0.00248258	0.00944077	0.0553149	0.00462096	0.0436429	0.000232585	2.66527	0.0112856	0.0145593	0.00497691	-0.00843707	0.00671418	0.0309825	0.00318094	0.0100664	9.16455e-05	1	0
	01O	ok	15	42.7966	0.966235	13.4412	75.3336	311.958	158.738	0.625276	46.0539	1.76431	0.040301	0.261081	0.0016405	0.00180658	3.28801e-05	6.38674	0.0206547	1.66483	0.00896397	0.0459736	0.0119761	0.00106244	0.00591317	0.0115584	0.000190034	8.90173	0.0160045	1.6994	0.00664883	-0.0203785	0.00916429	0.0481102	0.00444611	0.0214676	0.000158091	2.65568	0.0130565	0.0162026	0.00588977	-0.0015249	0.00777121	0.0290194	0.00394351	0.00976895	0.000109107	1	0
	01P	ok	20	42.2482	1.22035	0.979069	0.484195	1109.84	2624.85	0.45792	45.267	1.74144	0.0508847	0.259989	0.00203227	0.00183295	4.15582e-05	4.69561	0.0183522	1.21924	0.00824685	0.0213074	0.0114567	0.0106043	0.00523956	0.008752	0.000178221	7.23171	0.0148815	1.24524	0.00657933	-0.0565512	0.00936736	0.0473359	0.00417176	0.0186888	0.000155487	2.65874	0.0107399	0.0130373	0.00491428	-0.00449324	0.0066525	0.0268836	0.00320731	0.00983458	9.10745e-05	1	0
	01Q	ok	25	108.297	4.76854	0.192588	0.0692875	556.853	2447.03	0.14333	65.9734	4.54576	0.206139	0.145147	0.00381282	0.00113946	7.91841e-05	2.62908	0.0209973	0.381625	0.00953169	0.0082359	0.0132624	0.0168175	0.00602573	0.00322717	0.000189461	5.16321	0.0152415	0.402814	0.006599	-0.0666661	0.00880697	0.0469048	0.00443077	0.0132701	0.000142816	2.66658	0.0144423	0.00491395	0.00690447	-0.012111	0.0100018	0.0214022	0.00414885	0.010003	0.000128115	1	0
Integrated K/Ca ±2σ						12.3942	3.06902	SD		100										266.256
Weighted mean Age ±2σ				35.5744	2.56022	n=17/17	MSWD=*634.488
Total Integrated Age ±2σ				35.5924	0.110064
Isochron Age ±2σ				33.2179	0.269008		MSWD=*736.897
(40Ar/36Ar)trapped ±2σ				310.678	1.40073
	Sample:	SB-02 (manuscript Sample E)			Identifier:	1602	0.5 mg
	Material:	Biotite			Location:	34.07206111, -112.3677778
	03A	ok	0.25	54.5358	0.878032	9.80352	6.82441	3725.91	4000.47	0.456307	9.93626	2.25552	0.0368578	0.0440545	5.23533e-05	0.00301659	4.42455e-06	221.994	0.0268476	9.76593	0.0115426	0.256621	0.0124082	0.00811406	0.00561953	0.669765	0.000975426	225.122	0.0224484	9.82976	0.0073646	0.187341	0.00843336	0.0501313	0.00425124	0.691684	0.000804699	3.26878	0.0147263	0.0303493	0.00639754	0.00314028	0.00916913	0.0264297	0.00373155	0.0119177	0.000132524	1	0
	03B	ok	0.5	32.2962	0.178563	22.2312	6.23495	33553.7	62005.2	2.44956	24.1893	1.3276	0.00740516	0.182228	0.000114491	0.0025391	3.63012e-06	288.138	0.0274596	52.4258	0.0325402	0.782675	0.0126309	0.0193214	0.00535689	0.731792	0.00104051	291.263	0.0239055	52.5888	0.0101729	0.728715	0.0094704	0.0670364	0.00416253	0.754504	0.000823798	3.28141	0.0135115	0.031943	0.00586343	0.00135188	0.00839264	0.0264009	0.00342959	0.0119789	0.000121381	1	0
	03C	ok	0.75	28.7834	0.101905	19.141	1.82489	488070	5.24464e+06	5.96602	32.5998	1.18206	0.00421799	0.275843	0.000195697	0.00225729	3.01066e-06	463.637	0.0323397	127.685	0.0900716	1.75201	0.0117386	0.0544916	0.00514364	1.04713	0.00139134	466.799	0.0302547	127.956	0.0151554	1.68199	0.00920392	0.0902589	0.00424537	1.07394	0.0010811	3.3139	0.0114241	0.0360419	0.0049025	-0.00324804	0.00692109	0.0263268	0.00294936	0.0121364	0.000100804	1	0
	03D	ok	1	33.3586	0.0902893	26.3517	1.99773	148141	337646	9.81121	38.3108	1.37167	0.00374654	0.279357	0.000263503	0.00206596	2.48994e-06	752.873	0.0398452	209.981	0.197639	2.85433	0.0125445	0.0652975	0.0048825	1.55602	0.00187056	756.056	0.0382531	210.307	0.0179195	2.779	0.00919589	0.108583	0.00393858	1.58963	0.00132144	3.32655	0.0111506	0.0376369	0.00474745	-0.00503793	0.00663423	0.0262979	0.00291191	0.0121977	9.7134e-05	1	0
	03E	ok	1.25	34.0409	0.0898607	21.3294	1.00246	-57103.3	42533.9	13.7427	37.8983	1.39999	0.00373014	0.270758	0.000262561	0.00207979	2.29038e-06	1088.04	0.0503792	294.122	0.284741	3.98249	0.0140096	0.112549	0.00522976	2.26404	0.0024874	1091.25	0.0489226	294.583	0.0204598	3.9121	0.00946692	0.148438	0.00413059	2.30771	0.00158805	3.35903	0.0120265	0.0417345	0.00501904	-0.00963635	0.00682336	0.0262238	0.00322694	0.0123552	0.000101355	1	0
	03F	ok	1.5	35.6877	0.0808312	19.9021	0.840941	-51112.1	31889.5	15.2917	41.2672	1.46838	0.00335835	0.281097	0.000242498	0.00196692	2.0942e-06	1166.16	0.0542683	327.274	0.281739	4.38616	0.0142159	0.134044	0.00560375	2.29518	0.00243712	1169.4	0.0527107	327.938	0.0221668	4.32736	0.00961363	0.174393	0.00441505	2.33989	0.00153643	3.37168	0.0129084	0.0433301	0.00536224	-0.011427	0.00724093	0.026195	0.0034841	0.0124165	0.000107945	1	0
	03G	ok	1.75	38.2895	0.0857283	13.395	0.496308	-115949	193583	11.962	42.4477	1.57655	0.00356688	0.269297	0.000222026	0.00192738	2.22526e-06	952.194	0.0466699	256.013	0.210562	3.45122	0.0140922	0.15501	0.0057016	1.83711	0.00211433	955.505	0.0444594	256.772	0.0195803	3.3942	0.0102624	0.195448	0.00424884	1.87467	0.00136278	3.44861	0.014193	0.0487163	0.00589652	-0.00941644	0.00788989	0.0269657	0.00385335	0.0126639	0.000118022	1	0
	03H	ok	2	43.5862	0.0938484	11.1918	0.543414	-15005.5	4309.53	7.12867	44.4962	1.79725	0.00391604	0.247624	0.000174886	0.00185878	2.38513e-06	617.105	0.0386375	152.569	0.107252	2.02775	0.0119671	0.110375	0.0053273	1.14843	0.0014675	620.486	0.0368294	153.065	0.0152339	1.98074	0.00969435	0.151907	0.00430175	1.17591	0.00113621	3.53413	0.0116811	0.0511996	0.00506779	0.0032878	0.00652618	0.0285905	0.00321101	0.0128371	9.8042e-05	1	0
	03I	ok	2.5	44.6886	0.0806265	15.6321	1.03227	-16722.9	4906.98	8.29884	49.3377	1.84327	0.00336635	0.267717	0.000180252	0.00169657	2.1789e-06	664.498	0.0362547	177.613	0.119089	2.32674	0.0125872	0.0920501	0.00602894	1.12845	0.00144328	668.038	0.033503	178.233	0.0172143	2.29753	0.00941253	0.136439	0.00462022	1.15525	0.00106592	3.68131	0.0138549	0.0515752	0.00676335	0.0330188	0.00786958	0.0321556	0.00395741	0.0130591	0.000119855	1	0
	03J	ok	3	41.7631	0.0760007	19.548	0.932935	-18142.2	4152.04	12.3085	47.4646	1.72122	0.00316815	0.275817	0.000174385	0.00175931	2.0494e-06	956.619	0.0462112	263.427	0.1659	3.4584	0.0121739	0.109337	0.00516452	1.6842	0.0019564	960.022	0.0447932	264.32	0.0187521	3.43578	0.00940478	0.147763	0.00407848	1.71843	0.00136692	3.54208	0.0113598	0.0400386	0.00544952	0.0274597	0.00649405	0.0309889	0.00324378	0.0126311	9.955e-05	1	0
	03K	ok	4	42.6578	0.0873686	17.9214	1.43974	-28275.7	16073.1	7.27785	46.2096	1.75852	0.00364381	0.262826	0.000178126	0.00180136	2.37985e-06	593.591	0.0362209	155.761	0.105049	2.07246	0.0129322	0.0703385	0.0055981	1.07007	0.0014082	596.618	0.0336829	156.264	0.015312	2.03011	0.0100372	0.109754	0.0041817	1.09626	0.00102283	3.17385	0.0133198	0.0120667	0.00599985	0.0114468	0.0077849	0.0295089	0.00379691	0.0115225	0.000121353	1	0
	03L	ok	6	38.241	0.09747	22.5408	3.79246	-28859.7	25900.5	3.97947	43.0493	1.57454	0.0040553	0.273464	0.000177583	0.00190723	2.99067e-06	311.948	0.0289632	85.1691	0.0546868	1.13541	0.0113794	0.0306347	0.0050944	0.595273	0.000927971	314.952	0.0267743	85.4293	0.0125069	1.09253	0.00927978	0.0701924	0.0040794	0.614757	0.000782693	3.15308	0.0110454	0.0152292	0.00499888	0.00809836	0.00653635	0.0324217	0.0031214	0.011504	9.79974e-05	1	0
	03M	ok	8	50.1889	0.177706	-9.86484	3.64164	3953.64	2438.02	0.833033	50.2883	2.07326	0.00744201	0.242599	0.000232951	0.00166475	5.51072e-06	73.6105	0.0230068	17.8287	0.0161787	0.259909	0.0122532	-0.0143854	0.00533792	0.122317	0.000396135	76.5469	0.0186901	17.8948	0.00843129	0.184928	0.00913367	0.0443544	0.00389812	0.135214	0.00036986	3.07984	0.0134162	0.0195732	0.00615418	-0.00305933	0.00822764	0.0390086	0.00369023	0.011385	0.00010894	1	0
	03N	ok	10	78.4966	0.374869	-3.88267	1.68232	-1606.46	1181.24	0.260956	61.4513	3.26795	0.0159435	0.188068	0.000347294	0.00129087	9.04878e-06	29.7456	0.0199145	5.58501	0.00960875	0.0598465	0.011276	-0.0114795	0.00498434	0.0382195	0.000257792	32.6373	0.0165947	5.61703	0.00711244	0.00622627	0.00910366	0.0510992	0.00397904	0.049922	0.000242093	3.04153	0.0110092	0.0123145	0.00501013	-0.0079817	0.00671352	0.0372935	0.00304137	0.0112478	9.18027e-05	1	0
	03O	ok	12	103.474	0.661606	-32.2159	231.409	1262.48	1501.41	0.139805	67.9425	4.33756	0.0285253	0.156656	0.000517769	0.00107348	1.26186e-05	19.1297	0.0206236	2.99212	0.00934511	0.050732	0.0124324	-0.000728982	0.00532554	0.0205256	0.000227343	21.9163	0.0160601	3.01538	0.00697072	-0.0237243	0.00977226	0.0442728	0.00393953	0.0316323	0.000197273	2.9386	0.0129385	-0.00515232	0.00573302	-0.0169691	0.00776697	0.0330253	0.00363246	0.0108704	0.000116789	1	0
	03P	ok	15	96.0317	1.61532	1.31546	1.08634	238.036	135.996	0.0482465	56.4419	4.01732	0.0693623	0.140511	0.00122466	0.00145875	2.73357e-05	7.3583	0.0190483	1.03258	0.00858842	0.0337233	0.0109269	0.00626528	0.00516905	0.0108309	0.000184253	10.1317	0.0157693	1.04686	0.00713008	-0.0615481	0.00873196	0.0458026	0.00421783	0.0217779	0.000159519	2.92987	0.0106849	-0.00290386	0.00477172	-0.00995563	0.0066695	0.0332855	0.00306321	0.0108222	9.6036e-05	1	0
	03Q	ok	20	136.006	4.22284	0.842795	1.15757	-378.821	920.276	0.0227907	42.726	5.7527	0.185333	0.0742751	0.00146641	0.00191827	3.52766e-05	6.57445	0.021504	0.487769	0.00948997	0.00263647	0.0137935	0.00460985	0.0063259	0.0126764	0.000208497	9.35054	0.015849	0.506665	0.00681542	-0.0602428	0.00956382	0.0450721	0.00462445	0.0235223	0.000166668	2.90744	0.0145338	0.00287296	0.0066484	0.00806362	0.0100922	0.0339541	0.00442854	0.0106983	0.000128848	1	0
	03R	ok	25	254.313	5.61394	-0.627306	0.628717	-107.344	73.428	0.0223981	53.699	11.1165	0.262837	0.0483074	0.000926817	0.00155075	2.38915e-05	9.94261	0.022412	0.479367	0.00913448	-0.0109751	0.0134793	-0.00608384	0.00610135	0.015322	0.000217244	12.7124	0.0170606	0.497249	0.0063069	-0.0693117	0.00909254	0.0384534	0.00430116	0.0261943	0.000177598	2.90744	0.0145338	0.00287296	0.0066484	0.00806362	0.0100922	0.0339541	0.00442854	0.0106983	0.000128848	1	0
Integrated K/Ca ±2σ						18.5236	0.924632	SD		100										2140.21
Weighted mean Age ±2σ				39.0047	3.16716	n=18/18	MSWD=*3457.619
Total Integrated Age ±2σ				38.2431	0.0567805
Isochron Age ±2σ				35.0366	0.19471		MSWD=*5070.560
(40Ar/36Ar)trapped ±2σ				321.178	0.930797
Notes:
1Corrected: Isotopic intensities corrected for blank, baseline, radioactivity decay and detector intercalibration, not for interfering reactions.
2Intercepts: t-zero intercept corrected for detector baseline.
3Time interval (days) between end of irradiation and beginning of analysis.
X symbol preceding sample ID denotes analyses excluded from weighted-mean age calculations.
pX symbol preceding sample ID denotes analyses excluded plateau age calculations.
Errors quoted for individual analyses include analytical error only, without interfering reaction or J uncertainties.
Integrated age calculated by summing isotopic measurements of all steps.
Plateau age is inverse-variance-weighted mean of selected steps.
Plateau age error is inverse-variance-weighted mean error (Taylor, 1982) times root MSWD where MSWD>1.
Plateau error is weighted error of Taylor (1982).
Decay constants and isotopic abundances after (Min et al., 2000)
Ages calculated relative to FC-2 Fish Canyon Tuff sanidine interlaboratory standard at 28.201 Ma (Kuiper et al., 2008)
[truncated: 40 more columns]
